## **Salience network dynamics underlying successful resistance of temptation**

Running Title: Salience network and self-control

Rosa Steinke<sup>1,2,3,4,5\*</sup>, Jason S. Nomi<sup>5</sup>, Vince D. Calhoun<sup>6</sup>, Christine Stelzel<sup>1,7</sup>  
Lena M. Paschke<sup>1</sup>, Robert Gaschler<sup>8</sup>, Henrik Walter<sup>1,3,#</sup>, Lucina Q. Uddin<sup>5,9\*#</sup>

<sup>1</sup>Department of Psychiatry & Psychotherapy, Charité Universitätsmedizin Berlin, Berlin, Germany

<sup>2</sup>Department of Psychology, Technische Universität Dresden, Dresden, Germany

<sup>3</sup>Berlin School of Mind and Brain, Humboldt-Universität zu Berlin, Berlin, Germany

<sup>4</sup>Department of Psychology, Humboldt-Universität zu Berlin, Berlin, Germany

<sup>5</sup>Department of Psychology, University of Miami, Coral Gables, FL

<sup>6</sup>The Mind Research Network, Albuquerque, New Mexico, USA

<sup>7</sup>International Psychoanalytic University Berlin, Germany

<sup>8</sup>Department of Psychology, FernUniversität, Hagen, Hagen, Germany

<sup>9</sup>Neuroscience Program, University of Miami Miller School of Medicine, Miami, FL

# Equal contribution

### **\*Correspondence to:**

Dr. Rosa Steinke  
rosasteimke@gmx.de

or

Dr. Lucina Q. Uddin  
Department of Psychology  
University of Miami  
P.O. Box 248185  
Coral Gables, FL 33124, USA  
Email: [l.uddin@miami.edu](mailto:l.uddin@miami.edu)  
Phone: +1 305-284-3265

## Saliency Network and Self-control

### Abstract

Self-control and the ability to resist temptation are critical for successful completion of long-term goals. Contemporary models in cognitive neuroscience emphasize the primary role of prefrontal cognitive control networks in aligning behavior with such goals. Here we use gaze pattern analysis and dynamic functional connectivity fMRI data to explore how individual differences in the ability to resist temptation are related to intrinsic brain dynamics of the cognitive control and salience networks. Behaviorally, individuals exhibit greater gaze distance from target location (e.g. higher distractibility) during presentation of tempting erotic images compared with neutral images. Individuals whose intrinsic dynamic functional connectivity patterns gravitate towards configurations in which salience detection systems are less strongly coupled with visual systems resist tempting distractors more effectively. The ability to resist tempting distractors was not significantly related to intrinsic dynamics of the cognitive control network. These results suggest that susceptibility to temptation is governed in part by individual differences in salience network dynamics, and provide novel evidence for involvement of brain systems outside canonical cognitive control networks in contributing to individual differences in self-control.

**Keywords:** salience network, dynamic functional connectivity, self-control, temptation, resting state fMRI

## Saliency Network and Self-control

### Introduction

In our daily lives we constantly encounter situations that evoke conflicting response tendencies: on the one hand impulsive reactions towards tempting stimuli and on the other hand actions that serve the realization of previously set goals (Hofmann et al., 2012). Self-control is correlated with well being (Hofmann et al., 2014), and self-control failure has been related to addiction, obesity, posttraumatic stress disorder, depression, and attention-deficit hyperactivity disorder (Bechara, 2005; Kontinen et al., 2009; Özdemiir et al., 2014; Schweitzer & Sulzerazarov, 1995; Walter et al., 2010). This is why it is of great scientific interest to understand why some individuals are able to resist when faced with temptation, while others fail.

Erotic and sensual images are powerful visual temptations. The advertisement industry frequently makes use of erotic images (Reichert & Carpenter, 2004) because they are very salient, and trigger us to involuntarily look towards them (Sennwald et al., 2016). This might be the case because they trigger evolutionarily meaningful attention allocation and approach behaviors (Fromberger et al., 2012). Here we investigate the neural basis for individual differences in self-control in the face of temptation using a combination of eyetracking and dynamic functional connectivity fMRI.

The most prominent model of self-control is the dual-systems approach, which assumes that a reflective system serving higher-level goal representations can exert control over an impulsive system that reacts to stimuli in a direct automatic manner (e.g., Hofmann et al., 2009; Metcalfe & Mischel, 1999; Strack & Deutsch, 2004). The reflective system has been mainly associated with fronto-parietal cognitive control networks, while the impulsive system has been linked with visceral and sensory regions (McClure & Bickel, 2014). Prefrontal cortical regions have been associated with self-control (e.g. Hare et al., 2009; Hayashi et al., 2013). Based on this model, the cognitive control network is a prime candidate for studying individual differences in self-control.

Another potential candidate for explaining individual differences in self-control is the saliency network. The saliency network is comprised of bilateral insula, dorsal anterior cingulate cortex (dACC) and other subcortical and limbic structures (Seeley et al., 2007), and is implicated in the direction of attention towards important stimuli and integration of top down appraisal and bottom up visceral and sensory information (see Uddin, 2015, for review). This central role in integrating information is reflected

## Salience Network and Self-control

in its unique functional and structural connectivity profile. For example, the different insular nodes within the salience network are associated with distinct functional connectivity profiles; the dorsal anterior insular cortex coactivates with areas associated with cognitive processing, the ventral anterior insular coactivates with areas associated with affective processing and the posterior insular coactivates with sensorimotor processing areas (Chang et al., 2013; Uddin et al., 2014).

In the task presented here, attention allocation towards task relevant information is in conflict with attention allocation towards task irrelevant, yet intrinsically relevant, information (erotic distractors). As the salience network has been implicated in the allocation of attention processes towards task relevant information by interacting with other networks and the coordination of resources (Uddin, 2015), individual differences in salience network functioning might play an important role in explaining why some participants stay on task while others yield to the erotic distraction.

Most self-control research has focused on the down-regulation of impulses by cognitive control networks when examining individual differences in self-control, while studies of bottom-up processes that influence self-control are underrepresented (but see Steimke et al., 2016; Ludwig et al., 2013). Task based fMRI studies have indicated that self-control involves dorsolateral prefrontal cortex modulation of a value signal in the ventromedial prefrontal cortex (Hare et al., 2009). Recently, spontaneous fluctuations in resting state brain activity have been shown to demonstrate reproducible correlations across brain regions organized into networks (Shehzad et al., 2009). Because resting state networks are thought to represent individual differences in the brain's functional organization, resting state fMRI has become a leading approach for understanding individual differences in behavior (Dubois & Adolphs, 2016).

Dynamic functional connectivity of resting state fMRI data is a new approach that accounts for the non-stationarity of brain signals and enables the study of brain dynamics underlying behavior. Whereas the static functional connectivity approach assumes that the connectivity pattern of the brain remains stable over time, the dynamic functional connectivity approach accounts for moment-to-moment variability in connectivity profiles. Within this framework the brain engages in reoccurring time-varying functional relations that can be referred to as functional connectivity “states” (Calhoun et al., 2014; Hutchison et al., 2013). By taking time variation into account, the dynamic approach can give a more nuanced understanding of brain connectivity, which is vital for understanding the source of individual differences.

## Saliency Network and Self-control

Our previous work examining the dynamic functional connectivity profile of different insular subregions found partially distinct and partially overlapping dynamic state profiles of the anterior, ventral and posterior insular subdivisions, highlighting aspects of saliency network dynamics that have been previously overlooked (Nomi et al., 2016). Whole brain dynamic state characteristics are related to individual differences in executive function (Jia et al., 2014; Nomi et al., 2017; Yang et al., 2014) as well as mental illnesses including schizophrenia and bipolar affective disorder (Damaraju et al., 2014; Rashid et al., 2014). No previous studies have considered the relationship between saliency network dynamics and self-control.

Here we present results of a study examining the relationship between brain network dynamics and self-control in the face of temptation. Broadly, we expected that susceptibility to interference from visual distraction would be reflected in brain network dynamics. We predicted that individual differences in self-control would be related to cognitive control network dynamics, saliency network dynamics, or both. We explored these potential mechanisms underlying individual differences in self-control in a relatively large sample of 94 adults.

### Methods

#### *Participants*

Ninety-four current or former university or college students (Mean age = 25.93, SD = 3.84; 54 females) were included in the analysis. These data were part of a larger data set of 126 participants who also participated in additional fMRI tasks, self-control and cognitive control paradigms (Paschke et al., 2016; Sekutowicz et al., 2016). Of all participants, 109 had valid behavioral and eyetracking data (Steimke et al., 2016). Fifteen participants were excluded because either the fMRI registration process was not successful, or because the fMRI scans did not cover the whole brain.

#### *Self-Control Task*

In a task designed to assess self-control, participants were instructed to attend to a cued target location (left or right side of the screen) while facing the challenge to sustain attention despite neutral and erotic pictures presented as distractors on the other side of the screen (Figure 1 and 2; see Steimke et

## Saliency Network and Self-control

al., 2016 for behavioral and eyetracking results of the task). Eyetracking data were acquired using a video-based eyetracker (sampling rate: 250 Hz. spatial resolution: 0.05°, Cambridge Research Systems, UK). Participants were seated 36 cm from the screen. In order to reduce movement, participants were instructed to rest their chin and forehead on a chin rest. The distracting images were presented for a variable duration and elicited participants' eye gaze to shift away from the cued target location, resulting in poorer performance on the task, which was to identify by button press whether a white target letter was an "E" or an "F". Variable distractor durations were introduced to prevent participants from anticipating when the target letter would be presented. Motivation of participants to perform accurately on the task was enhanced by offering the chance of a 10 Euro reward for accurate performance on one trial, which was randomly selected after completion of the task. Target letters were presented for 10 ms against a dark grey background, and participants were instructed to respond as quickly and accurately as possible. The distractors consisted of neutral pictures (eg. neutrally rated objects or scenes) and erotic pictures (pictures of couples in erotic situations) displayed on the contralateral side of the screen relative to the target location. Note that the task also included other conditions not reported here. Pictures were selected on the basis of valence, arousal, and attraction ratings from 96 independent participants and erotic and neutral pictures were matched for brightness and complexity. Eye gaze distance from target location was used as a dependent variable. Specifically, the gaze distance difference score between trials with erotic and trials with neutral distraction was used. Gaze distance was used, as it is the most direct measure of distractibility. Additionally, it was found that gaze distance, not reaction time, was related to delay of gratification in this task: participants who couldn't resist to eat one sweet immediately instead of waiting for two sweets after 45 minutes also showed greater gaze distance from target when erotic pictures were presented than participants who chose to wait (Steimke et al., 2016). A short test of fluid intelligence (LPS, Leistungsprüfungsystem Unterteil 3, Horn, 1983) was performed in order to be able to control for individual differences in intelligence.

### *fMRI data acquisition and preprocessing*

Each participant underwent resting-state fMRI scans during which they kept their eyes open and fixated on a fixation cross. Whole-brain fMRI data were collected with a 3 Tesla Siemens Tim Trio MRI

## Saliency Network and Self-control

scanner (Siemens, Erlangen, Germany) on a separate day from the behavioral testing. Using a 12-channel head coil, 32 slices were acquired in descending order with a T2\*-sensitive one-shot gradient-echo echo-planar sequence. To minimize motion, the head was fixated with cushions. The following parameters were used: repetition time of 2 s, echo time of 25 ms, flip angle of 78, data acquisition matrix of 64x64, field of view of 24 cm, voxel size of 3x3x3mm and an inter-slice gap of 0.75 mm, 180 volumes. Preprocessing was performed with the Data Processing Assistant for Resting-state fMRI (<http://restfmri.net>). In order to ensure data were at signal equilibrium, the first 10 volumes were removed. Slice time correction was performed, the data were realigned, normalized to an EPI template, and smoothed with a 8mm Gaussian kernel.

## Independent Component Analysis

The first step in the dynamic functional network connectivity (dFNC) analysis was to parcellate the brain into regions of interest using a high-model order group independent component analysis (ICA) implemented with the GIFT toolbox (<http://mialab.mrn.org/software/gift/>) using the infomax algorithm (Calhoun, Adali, Pearlson, & Pekar, 2001; Calhoun & Adali, 2012). A high-model order of 100 independent components was chosen based on previous work demonstrating that this number of components sufficiently parcellates major brain networks (default mode network: DMN; cognitive control network: CCN; saliency network: SN) into individual brain areas that allows for more fine grained examination of network node interactions (Damaraju et al., 2014; Nomi et al., 2016, 2017). Additional research demonstrates that model orders of 100 and below have better reproducibility than model orders higher than 100 (Abou-Elseoud et al., 2010). Stability of ICs were ensured by repeating the infomax algorithm 10 times using ICASSO and selecting the central run for further analysis. Subject specific spatial maps and time courses were back-reconstructed using the GICA1 method (Erhardt et al., 2011).

The ICA produced 100 ICs that were then subjected to visual inspection in order to eliminate components containing white matter, cerebral spinal fluid, movement, or large amounts of high-frequency information (Allen et al., 2011; Damoiseaux et al., 2006; Nomi et al., 2016, 2017). This resulted in 44 ICs of interest that were grouped into functional networks by visual inspection following previous work: SN, CCN, visual network, components of the temporal lobes, DMN, components of the cerebellum, and a

## Saliency Network and Self-control

subcortical network (see Figure 3a). The correlation matrix representing overall strength of coupling between these ICs can be seen in Figure 3b.

### *Independent Component Post-processing*

Post-processing of non-noise ICs in GIFT consisted of despiking, detrending (linear, cubic, quadratic), regression of the Friston 24 motion parameters, and a low pass filter (0.15 Hz). Despiking replaces outliers in IC time courses larger than the absolute median deviation with a third-order spline fit to clean portions of the data using AFNI's 3dDespike algorithm. Despiking decreases the temporal derivative (DVARs) (Power et al., 2011) over IC time courses and eliminates artifacts in dFNC analyses (Damaraju et al., 2014).

### *Sliding Window Analysis*

Post-processed IC time courses were analyzed by using a sliding window dFNC algorithm in GIFT using window sizes of 22 TRs (44 seconds) slid in 1 TR. A window size of 44 seconds was chosen as previous dFNC work utilized window sizes of 44 (Yang et al., 2014) and 45 seconds (Damaraju et al., 2014; Nomi et al., 2016). Furthermore, previous dFNC research has demonstrated that window sizes of 30-60 seconds capture distinct dynamic functional connections not found in larger window sizes (Damaraju et al., 2014; Hutchison et al., 2013), methodological dFNC work has shown that such window sizes represent real fluctuations in functional connectivity (Leonardi & Van De Ville, 2015; Sakoglu et al., 2010). Additional empirical research demonstrates that these window sizes are able to capture cognitive states (Shirer, Ryali, Rykhlevskaia, Menon, & Greicius, 2012; Wilson et al., 2015).

A tapered window consisting of a rectangle convolved with a Gaussian ( $\sigma = 3$ ) was utilized in order to account for the limited number of time points in each sliding window. This produced a covariance matrix with the dimensions of 946 (sliding windows) x 148 (paired connections) per subject. In order to further account for noise that may arise from a limited number of time points, each covariance matrix was regularized using the graphical LASSO method (L1 norm) (Friedman, Hastie, & Tibshirani, 2008) of the inverse covariance matrix resulting in a correlation matrix (Damaraju et al., 2014).



## Saliency Network and Self-control

### *Cognitive Control Network and Saliency Network Dynamic States*

Windowed correlation matrices for components within the cognitive control network and saliency network were extracted and subjected to k-means clustering independently. The saliency network consisted of the bilateral insular, the dorsal anterior cingulate cortex and the orbitofrontal cortex; the cognitive control network consisted of bilateral dorsolateral prefrontal and parietal regions (see Figure 3a for saliency and cognitive control network nodes and Figure 3b for the extracted matrices). In order to be able to perform k-means clustering, the sliding windows of all participants were concatenated for the cognitive control and saliency network separately. Using these concatenated saliency and concatenated cognitive control networks, the number of optimal number of clusters was determined by using the elbow criterion applied to the cluster validity index derived from k-means clustering using “city block” distance function (Allen et al., 2014) performed for clustering values between 2-20. This analysis revealed that 5 is the optimal number of clusters for the saliency network as well as for the cognitive control network, therefore the 5 cluster solutions for all results are presented.

For each of the 5 cognitive and the 5 saliency network states, frequency and dwell time were calculated. Frequency was calculated as the percent that a brain state prevailed throughout the duration of the scan. Dwell time was calculated as the average length, measured in number of sliding windows, that a participant stayed in a given brain state. Pearson correlations were calculated to relate frequency and dwell time of cognitive and saliency network states to distractibility by erotic temptation.

## Results

### *Dynamic Saliency Network States*

We identified 5 different saliency network states (see Figure 4a). Note that the states are sorted by the average percent of time participants spent in each of the five states. On average, participants spent 39.53 percent of their time in state 1 ( $SD = 27.54$ ), 16.55 percent of their time in state 2 ( $SD = 16.59$ ), 16.02 percent of their time in state 3 ( $SD = 15.72$ ), 15.53 of their time in state 4 ( $SD = 17.06$ ), and 12.37 percent of the time in state 5 ( $SD = 16.15$ ). Repeating of k-means clustering to a total of 5 estimates revealed stability of the results (see Table 1). Considering the frequency spent in each state, there is a floor effect for some participants, meaning they did not spend any time in that state at all. Five

## Saliency Network and Self-control

participants did not enter into state 1, 21 participants did not enter into state 2, 22 participants did not enter into state 3, 19 did not enter into state 4, and 33 did not enter into state 5. Not all participants enter into each state because k-means clustering of the concatenated data matrix including all subjects allows for the possibility that individual subjects will not contribute to each state (Damaraju et al., 2015; Nomi et al., 2016, 2017). The dwell time on average was 22.56 (SD = 26.00) for state 1, 10.87 (SD = 8.97) for state 2, 9.50 (SD = 8.25) for state 3, 9.70 (SD = 9.53) for state 4, and 9.98 (SD = 12.45) for state 5.

### *Dynamic Cognitive Control Network States*

We identified 5 different cognitive control network states (see Figure 4b). The states are sorted by the average percent of time participants spent in each of the five states. On average, the participants spent 34.74 percent in state 1 (SD = 26.21), 17.98 percent of their time in state 2 (SD = 17.52), 17.92 percent in state 3 (SD = 17.67), 17.14 percent in state 4 (SD = 17.97), and 12.22 percent of their time in state 5 (SD = 13.84). Repeating of k-means clustering to a total of 5 estimates revealed stability of the results (see Table 2). Concerning the frequency, 3 participants did not adopt state 1, 20 participants did not adopt state 2, 18 participants did not adopt state 3, 18 did not adopt state 4, and 28 did not adopt state 5. The dwell time on average was 20.65 (SD = 26.37) for state 1, 10.96 (SD = 10.52) for state 2, 10.93 (SD = 8.35) for state 3, 11.90 (SD = 11.37) for state 4, and 10.76 (SD = 11.19) for state 5.

### *Correlations with Eye Gaze Behavior*

As reported in the behavioral paper (Steimke et al., 2016) distracting images elicited participants' eye gaze to shift away from the target location, resulting in poorer performance on the task (Figure 2). Difficulty resisting temptations as indicated by gaze distance difference between erotic and neutral distractors was negatively correlated with the time spent in saliency network state 4,  $r(92) = -0.26$ ,  $p = 0.012$ . This correlation remained significant when excluding participants who did not spend any time in state 4,  $r(73) = -0.25$ ,  $p = 0.031$ . Comparing participants who did not adopt state 4 at all with those who did ever adopt state 4, using between group t-testing, revealed marginally significant higher distraction by temptation for participants who adopted state 4,  $t(91) = 1.98$ ,  $p = .051$ . State 4 represents a dynamic functional connectivity state wherein the saliency network was negatively correlated with the visual

## Salience Network and Self-control

network. All other states were not significantly correlated with performance on the temptation task (see Figure 5a). Posthoc analysis revealed that time spent in state 4 was negatively correlated with time spent in state 1 ( $r(92) = -0.36$ ,  $p < 0.001$ ). Further posthoc testing revealed that the significant negative correlation between time spent in state 4 and ability to resist temptation remained significant when controlling for age, gender and fluid intelligence as measured by LPS ( $r = -0.276$ ,  $p = 0.008$ ,  $df = 89$ ). Correlating dwell time of the 5 salience network states with the ability to resist temptations revealed the same pattern as for frequency: state 4 showed a significant negative correlation, while the others did not (Figure 5b). There was no correlation between frequency or dwell time of any of the five cognitive control network states with self-control in the face of temptation (see Figure 6a and 6b).

## Discussion

Self-control is critical for successful long-term goal attainment. Here we use gaze pattern analysis in a self-control task and dFNC analysis of resting state fMRI data to explore how individual differences in the ability to resist tempting distractors are related to intrinsic brain dynamics. We show that participants whose intrinsic connectivity patterns gravitate towards configurations in which salience detection systems are less strongly coupled with visual systems could resist tempting distractors more effectively. Our results suggest that individuals whose brains spend more time in a state where salience and visual networks are decoupled were less distractible by erotic pictures. Most models of self-control posit a key role for prefrontal cognitive control networks in regulatory processes involved in overcoming the impulse to engage with salient distracting stimuli (Hare et al., 2009; Hayashi et al., 2013). The current results, in contrast, demonstrate for the first time that salience network dynamic coupling tendencies may contribute to individual differences in the ability to resist temptation.

The salience network, with key nodes in insular and anterior cingulate cortices, plays a central role in detection of behaviorally relevant stimuli and the coordination of neural resources. In particular, the dorsal anterior insular node of the salience network is thought to causally influence task-positive and default mode networks (Uddin et al., 2011). Salience network dysfunction has been linked with host of psychiatric conditions, particular those involving self-regulation and executive function deficits (Uddin, 2015). For these reasons, we predicted that individual differences in intrinsic salience network dynamics

## Saliency Network and Self-control

may contribute to the ability to focus and maintain attention when faced with tempting distractors.

Examination of saliency network dynamics revealed the existence of 5 distinct connectivity states of this network (Figure 4). State 1, which was occupied nearly 40% of the time, was characterized by a large amount of correlations centered around zero. This is in line with previous studies (Damaraju et al., 2014; Nomi et al., 2017) which consistently show that brain states with the highest frequency of occurrence show a greater amount of correlations centered around zero compared to less frequently occurring states. State 2 was characterized by positive correlations of the saliency network with the sensory motor network. Both State 2 and State 3 showed positive intercorrelations within the saliency network and negative correlation of the saliency with the default mode network. State 4 also showed a negative correlation of saliency network with default network and intercorrelation within saliency network. The most pronounced characteristic by which state 4 differed from the other states was the negative correlation of the saliency network and the visual network. The least frequent state 5 showed mixed positive and negative correlation with regions in the sensorimotor networks, within saliency network correlations centered around zero and correlation of saliency network with default mode centered around zero.

Examination of cognitive control network dynamics revealed 5 cognitive control network states. The most frequent cognitive control network state (state 1) was occupied approximately 35 percent of the time and was characterized by a greater number of correlations centered around zero, in contrast to the other 4 states. This was the case for within cognitive control network intercorrelations and correlations of the cognitive control network with the rest of the brain.

The only significant relationship between brain network dynamics and individual differences in behavior was observed for saliency network state 4. Both frequency and dwell time were significantly correlated with distractibility by erotic images as measured by gaze distance from target presentation.

In a recent whole brain dynamic functional connectivity study by Nomi et al. (2017), successful executive function was associated with spending more time in the most frequently occurring state, whereas in our study self-control was not associated with time spent in the most frequently occurring dynamic state. These results demonstrate for the first time how highly salient distractors can interfere with top-down control processes to a greater extent in individuals who exhibit specific patterns of intrinsic

## Saliency Network and Self-control

functional connectivity dynamics.

The current results provide more nuanced tests of the dual-systems model, which pits cognitive control systems against “impulsive” brain systems that react automatically to salient stimuli. Our separate analyses of cognitive control network dynamics and saliency network dynamics indeed do not support the predictions of a traditional dual-systems approach. Instead, our findings suggest that when visual input has less access to saliency detection systems, tempting erotic distractors are easier to ignore. These findings highlight the importance of considering “neural context” in studies of brain function; the idea that the functional relevance of a brain system depends on the status of other connected areas (McIntosh, 2004).

### *Limitations*

K-means is a powerful algorithm to identify a predefined number of clusters in a dataset. However, it has also been criticized as the starting point of the algorithm can influence the clustering. If the number of clusters is chosen that does not match the dataset, the clustering can become unstable and repetition of the analysis can yield significantly different results. To address this limitation, we repeated the analysis 5 times. In Table 1 the percent time spent in each state for the five analyses is presented. The divergence between analysis lies below 0.1 percent, suggesting that the divergence between analyses is minor and the k-means clustering yielded stable results in our dataset.

With a p-value of 0.012, the results presented here do not survive the conservative Bonferroni correction for multiple comparisons. A corrected value would be marginally significant ( $p = .06$ ). Therefore the results presented here should be regarded with caution and should be replicated in future studies. With a sample size of 94 we have a relatively large sample for a combined fMRI and eyetracking study. However, as was noted by Schönbrodt and Perugini (2013) a sample size of higher than 150-250 is even more reliable for examining correlations. Future work with larger sample sizes is needed to further support the results presented here.

### *Conclusions*

Studying saliency network dynamics might deliver valuable insight into the origin of individual

## **Saliency Network and Self-control**

differences in self-control ability. We show that participants who spent more time in a brain network configuration in which saliency detection systems are decoupled from visual systems could resist tempting distractors more effectively. This suggests that individual differences in self-control in the face of temptation might be driven in part by saliency network functional connectivity context.

## **Acknowledgements**

We thank the Berlin School of Mind and Brain, the Humboldt University Berlin, and the Collaborative Research Centre “Volition and Cognitive Control” (DFG grant SFB 940/1 2013), Technical University Dresden, for financially supporting the project. This work was also supported by award R01MH107549 from the National Institute of Mental Health to LQU.

## Saliency Network and Self-control

### References

- Abou-Elseoud, A., Starck, T., Remes, J., Nikkinen, J., Tervonen, O., & Kiviniemi, V. (2010). The effect of model order selection in group pica. *Human Brain Mapping*, 31(8), 1207-1216.
- Allen, E., Erhardt, E., Damaraju, E., Gruner, W., Segall, J., Silva, R., . . . Calhoun, V. (2011). A baseline for the multivariate comparison of resting-state networks. *Frontiers in Systems Neuroscience*, 5(2).
- Bechara, A. (2005). Decision making, impulse control and loss of willpower to resist drugs: A neurocognitive perspective. *Nature Neuroscience*, 8(11), 1458-1463.
- Calhoun, V., Adali, T., Pearson, G., & Pekar, J. (2001). A method for making group inferences using independent component analysis of functional mri data: Exploring the visual system. *Neuroimage*, 13(6), S88-S88.
- Calhoun, V. D., & Adali, T. (2012). Multi-subject independent component analysis of fmri: A decade of intrinsic networks, default mode, and neurodiagnostic discovery. *IEEE reviews in biomedical engineering*, 5, 60-73.
- Calhoun, V. D., Miller, R., Pearson, G., & Adali, T. (2014). The chronnectome: Time-varying connectivity networks as the next frontier in fmri data discovery. *Neuron*, 84(2), 262-274.
- Chang, L. J., Yarkoni, T., Khaw, M. W., & Sanfey, A. G. (2013). Decoding the role of the insula in human cognition: Functional parcellation and large-scale reverse inference. *Cerebral Cortex*, 23(3), 739-749.
- Damaraju, E., Allen, E. A., Belger, A., Ford, J. M., McEwen, S., Mathalon, D. H., . . . Calhoun, V. D. (2014). Dynamic functional connectivity analysis reveals transient states of dysconnectivity in schizophrenia. *Neuroimage-Clinical*, 5, 298-308.
- Damoiseaux, J. S., Rombouts, S. A., Barkhof, F., Scheltens, P., Stam, C. J., Smith, S. M., & Beckmann, C. F. (2006). Consistent resting-state networks across healthy subjects. *Proc Natl Acad Sci U S A*, 103(37), 13848-13853.
- Dubois, J., & Adolphs, R. (2016). Building a science of individual differences from fmri. *Trends in Cognitive Sciences*, 20(6), 425-443.
- Erhardt, E. B., Rachakonda, S., Bedrick, E. J., Allen, E. A., Adali, T., & Calhoun, V. D. (2011). Comparison of multi-subject ica methods for analysis of fmri data. *Human Brain Mapping*, 32(12), 2075-2095.
- Friedman, J., Hastie, T., & Tibshirani, R. (2008). Sparse inverse covariance estimation with the graphical lasso. *Biostatistics*, 9(3), 432-441.
- Fromberger, P., Jordan, K., von Herder, J., Steinkrauss, H., Nemetschek, R., Stolpmann, G., & Muller, J. L. (2012). Initial orienting towards sexually relevant stimuli: Preliminary evidence from eye movement measures. *Archives of Sexual Behavior*, 41(4), 919-928.
- Hare, T. A., Camerer, C. F., & Rangel, A. (2009). Self-control in decision-making involves modulation of the vmppfc valuation system. *Science*, 324(5927), 646-648.
- Hayashi, T., Ko, J. H., Strafella, A. P., & Dagher, A. (2013). Dorsolateral prefrontal and orbitofrontal cortex interactions during self-control of cigarette craving. *Proceedings of the National Academy of Sciences of the United States of America*, 110(11), 4422-4427.
- Hofmann, W., Baumeister, R. F., Forster, G., & Vohs, K. D. (2012). Everyday temptations: An experience sampling study of desire, conflict, and self-control. *Journal of Personality and Social Psychology*, 102(6), 1318-1335.
- Hofmann, W., Friese, M., & Strack, F. (2009). Impulse and self-control from a dual-systems perspective. *Perspectives on Psychological Science*, 4(2), 162-176.
- Hofmann, W., Luhmann, M., Fisher, R. R., Vohs, K. D., & Baumeister, R. F. (2014). Yes, but are they happy? Effects of trait self-control on affective well-being and life satisfaction. *Journal of Personality*, 82(4), 265-277.
- Horn, W. (1983). *L-p-s leistungsprüfssystem*. (2 ed.). Göttingen: Hogrefe.
- Hutchison, R. M., Womelsdorf, T., Gati, J. S., Everling, S., & Menon, R. S. (2013). Resting-state networks show dynamic functional connectivity in awake humans and anesthetized macaques. *Human Brain Mapping*, 34(9), 2154-2177.



## Saliency Network and Self-control

- Jia, H., Hu, X., & Deshpande, G. (2014). Behavioral relevance of the dynamics of the functional brain connectome. *Brain Connect*, 4(9), 741-759.
- Kiviniemi, V., Starck, T., Remes, J., Long, X., Nikkinen, J., Haapea, M., . . . Zang, Y. F. (2009). Functional segmentation of the brain cortex using high model order group pica. *Human Brain Mapping*, 30(12), 3865-3886.
- Konttinen, H., Haukkala, A., Sarlio-Lähteenkorva, S., Silventoinen, K., & Jousilahti, P. (2009). Eating styles, self-control and obesity indicators. The moderating role of obesity status and dieting history on restrained eating. *Appetite*, 53(1), 131-134.
- Lang, P., Bradley, M., & Cuthbert, B. N. (2008). International affective picture system (iaps): Affective ratings of pictures and instruction manual.
- Leonardi, N., & Van De Ville, D. (2015). On spurious and real fluctuations of dynamic functional connectivity during rest. *Neuroimage*, 104, 430-436.
- McClure, S. M., & Bickel, W. K. (2014). A dual-systems perspective on addiction: Contributions from neuroimaging and cognitive training. *Addiction Reviews*, 1327, 62-78.
- Metcalfe, J., & Mischel, W. (1999). A hot/cool-system analysis of delay of gratification: Dynamics of willpower. *Psychological Review*, 106(1), 3-19.
- Nomi, J.S., Farrant, K., Damaraju, E., Rachakonda, S., Calhoun, V.C., & Uddin, L.Q. (2016). Dynamic functional network connectivity reveals unique and overlapping profiles of insula subdivisions. *Human Brain Mapping*, 37(5), 1770-1787.
- Nomi, J. S., Vij, S. G., Dajani, D. R., Steimke, R., Damaraju, E., Rachakonda, S., . . . Uddin, L. Q. (2-17). Chronnectomic patterns and neural flexibility underlie executive function. *Neuroimage*, 147, 861-871.
- Özdemir, Y., Kuzucu, Y., & Ak, Ş. (2014). Depression, loneliness and internet addiction: How important is low self-control? *Computers in Human Behavior*, 34, 284-290.
- Paschke, L. M., Dorfel, D., Steimke, R., Trempler, I., Magrabi, A., Ludwig, V. U., . . . Walter, H. (2016). Individual differences in self-reported self-control predict successful emotion regulation. *Social Cognitive and Affective Neuroscience*, 11(8), 1193-1204.
- Power, J. D., Cohen, A. L., Nelson, S. M., Wig, G. S., Barnes, K. A., Church, J. A., . . . Schlaggar, B. L. (2011). Functional network organization of the human brain. *Neuron*, 72(4), 665-678.
- Rashid, B., Damaraju, E., Pearson, G. D., & Calhoun, V. D. (2014). Dynamic connectivity states estimated from resting fmri identify differences among schizophrenia, bipolar disorder, and healthy control subjects. *Frontiers in Human Neuroscience*, 8.
- Reichert, T., & Carpenter, C. (2004). An update on sex in magazine advertising: 1983 to 2003. *Journalism & Mass Communication Quarterly*, 81(4), 823-837.
- Sakoglu, U., Pearson, G. D., Kiehl, K. A., Wang, Y. M., Michael, A. M., & Calhoun, V. D. (2010). A method for evaluating dynamic functional network connectivity and task-modulation: Application to schizophrenia. *Magnetic Resonance Materials in Physics Biology and Medicine*, 23(5-6), 351-366.
- Schönbrodt, F. D., & Perugini, M. (2013). At what sample size do correlations stabilize? *Journal of Research in Personality*, 47(5), 609-612.
- Schweitzer, J. B., & Sulzerazoff, B. (1995). Self-control in boys with attention-deficit hyperactivity disorder - effects of added stimulation and time. *Journal of Child Psychology and Psychiatry and Allied Disciplines*, 36(4), 671-686.
- Sekutowicz, M., Schmack, K., Steimke, R., Paschke, L., Sterzer, P., Walter, H., & Stelzel, C. (2016). Striatal activation as a neural link between cognitive and perceptual flexibility. *Neuroimage*, 141, 393-398.
- Sennwald, V., Pool, E., Brosch, T., Delplanque, S., Bianchi-Demicheli, F., & Sander, D. (2016). Emotional attention for erotic stimuli: Cognitive and brain mechanisms. *Journal of Comparative Neurology*, 524(8), 1668-1675.
- Shehzad, Z., Kelly, A. M. C., Reiss, P. T., Gee, D. G., Gotimer, K., Uddin, L. Q., . . . Milham, M. P. (2009). The resting brain: Unconstrained yet reliable. *Cerebral Cortex*, 19(10), 2209-2229.
- Shirer, W., Ryali, S., Rykhlevskaia, E., Menon, V., & Greicius, M. (2012). Decoding subject-driven cognitive states with whole-brain connectivity patterns. *Cerebral Cortex*, 22(1), 158-165.



## Saliency Network and Self-control

- Steimke, R., Stelzel, C., Gaschler, R., Rothkirch, M., Ludwig, V. U., Paschke, L. M., . . . Walter, H. (2016). Decomposing self-control: Individual differences in goal pursuit despite interfering aversion, temptation, and distraction. *Frontiers in Psychology, 7*.
- Strack, F., & Deutsch, R. (2004). Reflective and impulsive determinants of social behavior. *Personality and Social Psychology Review, 8*(3), 220-247.
- Uddin, L. Q. (2015). Saliency processing and insular cortical function and dysfunction. *Nature Reviews Neuroscience, 16*(1), 55-61.
- Uddin, L. Q., Kinnison, J., Pessoa, L., & Anderson, M. L. (2014). Beyond the tripartite cognition-emotion-interoception model of the human insular cortex. *Journal of Cognitive Neuroscience, 26*(1), 16-27.
- Walter, K. H., Gunstad, J., & Hobfoll, S. E. (2010). Self-control predicts later symptoms of posttraumatic stress disorder. *Psychological Trauma-Theory Research Practice and Policy, 2*(2), 97-101.
- Wilson, R. S., Mayhew, S. D., Rollings, D. T., Goldstone, A., Przydzik, I., Arvanitis, T. N., & Bagshaw, A. P. (2015). Influence of epoch length on measurement of dynamic functional connectivity in wakefulness and behavioural validation in sleep. *Neuroimage, 112*, 169-179.
- Yang, Z., Craddock, R. C., Margulies, D. S., Yan, C. G., & Milham, M. P. (2014). Common intrinsic connectivity states among posteromedial cortex subdivisions: Insights from analysis of temporal dynamics. *Neuroimage, 93 Pt 1*, 124-137.

## Saliency Network and Self-control

### Figure Legends

**Figure 1.** Display of the trial timing. A trial starts with a fixation cross. The fixation cross is followed by an arrow indicating the location of the next target letter "E" or "F" presented 5.9° of visual angle left or right from the center. After the arrow presentation the screen a cleared screen is presented for variable delay. Afterwards either a neutral or an erotic distractor is presented for a variable duration immediately followed by the target letter. Drawings are placeholders for photographs from the International Affective Picture System (Lang et al., 2008) and the internet.

**Figure 2.** Display of behavioral and eyetracking data. Mean reaction times, percent errors, gaze distance and standard deviation of the gaze distance (SD). Asterisks (\*) indicate a significant difference at  $p < 0.05$ . Error bars represent the 95% confidence interval for within-subjects comparisons (Loftus and Masson, 1994).

**Figure 3.** Brain networks and Static Connectivity. a) Display of the nodes identified by the ICA grouped into functional networks; each color represents a node within the network. b) Static whole brain functional connectivity correlation matrix; cognitive and saliency networks used in the dynamic resting state analysis are highlighted by red boxes.

**Figure 4.** Display of the connectivity matrices of the five dynamic a) saliency and b) cognitive control network states. States are ordered by the most frequent (state 1) to the least frequent (state 5). The frequency is indicated in percent time spent in each state.

**Figure 5.** Correlations of a) frequency and b) dwell time of the 5 saliency network states with the temptation gaze effect: the higher the temptation gaze effect, the more participants' gaze drifted from the target location in the face of tempting distractors. The asterisk (\*) indicates a significant difference at  $p < .05$ .

**Figure 6.** Correlations of a) frequency and b) dwell time of the 5 cognitive control network states with the temptation gaze effect: the higher the temptation gaze effect, the higher the distractibility by erotic images.

## Saliency Network and Self-control

**Table 1.** Percent of time spent in each saliency network state. Repetition of k-means clustering reveals similar results, suggesting that the clustering is stable in this dataset.

|                                | State 1 | State 2 | State 3 | State 4 | State 5 |
|--------------------------------|---------|---------|---------|---------|---------|
| <b>1<sup>st</sup> analysis</b> | 39.53%  | 16.55%  | 16.02%  | 15.53%  | 12.37%  |
| <b>2<sup>nd</sup> analysis</b> | 39.50%  | 16.50%  | 16.04%  | 15.52%  | 12.44%  |
| <b>3<sup>rd</sup> analysis</b> | 39.53%  | 16.54%  | 16.03%  | 15.53%  | 12.36%  |
| <b>4<sup>th</sup> analysis</b> | 39.53%  | 16.54%  | 16.01%  | 15.53%  | 12.38%  |
| <b>5<sup>th</sup> analysis</b> | 39.53%  | 16.55%  | 16.02%  | 15.53%  | 12.37%  |

**Table 2.** Percent of time spent in each cognitive control network state. Repetition of k-means clustering reveals similar results, suggesting that the clustering is stable in this dataset.

|                                | State 1 | State 2 | State 3 | State 4 | State 5 |
|--------------------------------|---------|---------|---------|---------|---------|
| <b>1<sup>st</sup> analysis</b> | 34.74%  | 17.98%  | 17.92%  | 17.14%  | 12.22%  |
| <b>2<sup>nd</sup> analysis</b> | 34.74%  | 17.98%  | 17.92%  | 17.14%  | 12.22%  |
| <b>3<sup>rd</sup> analysis</b> | 34.55%  | 17.97%  | 18.21%  | 17.13%  | 12.15%  |
| <b>4<sup>th</sup> analysis</b> | 34.61%  | 17.75%  | 18.07%  | 17.10%  | 12.46%  |
| <b>5<sup>th</sup> analysis</b> | 34.74%  | 17.98%  | 17.92%  | 17.14%  | 12.22%  |

## **Salience Network and Self-control**

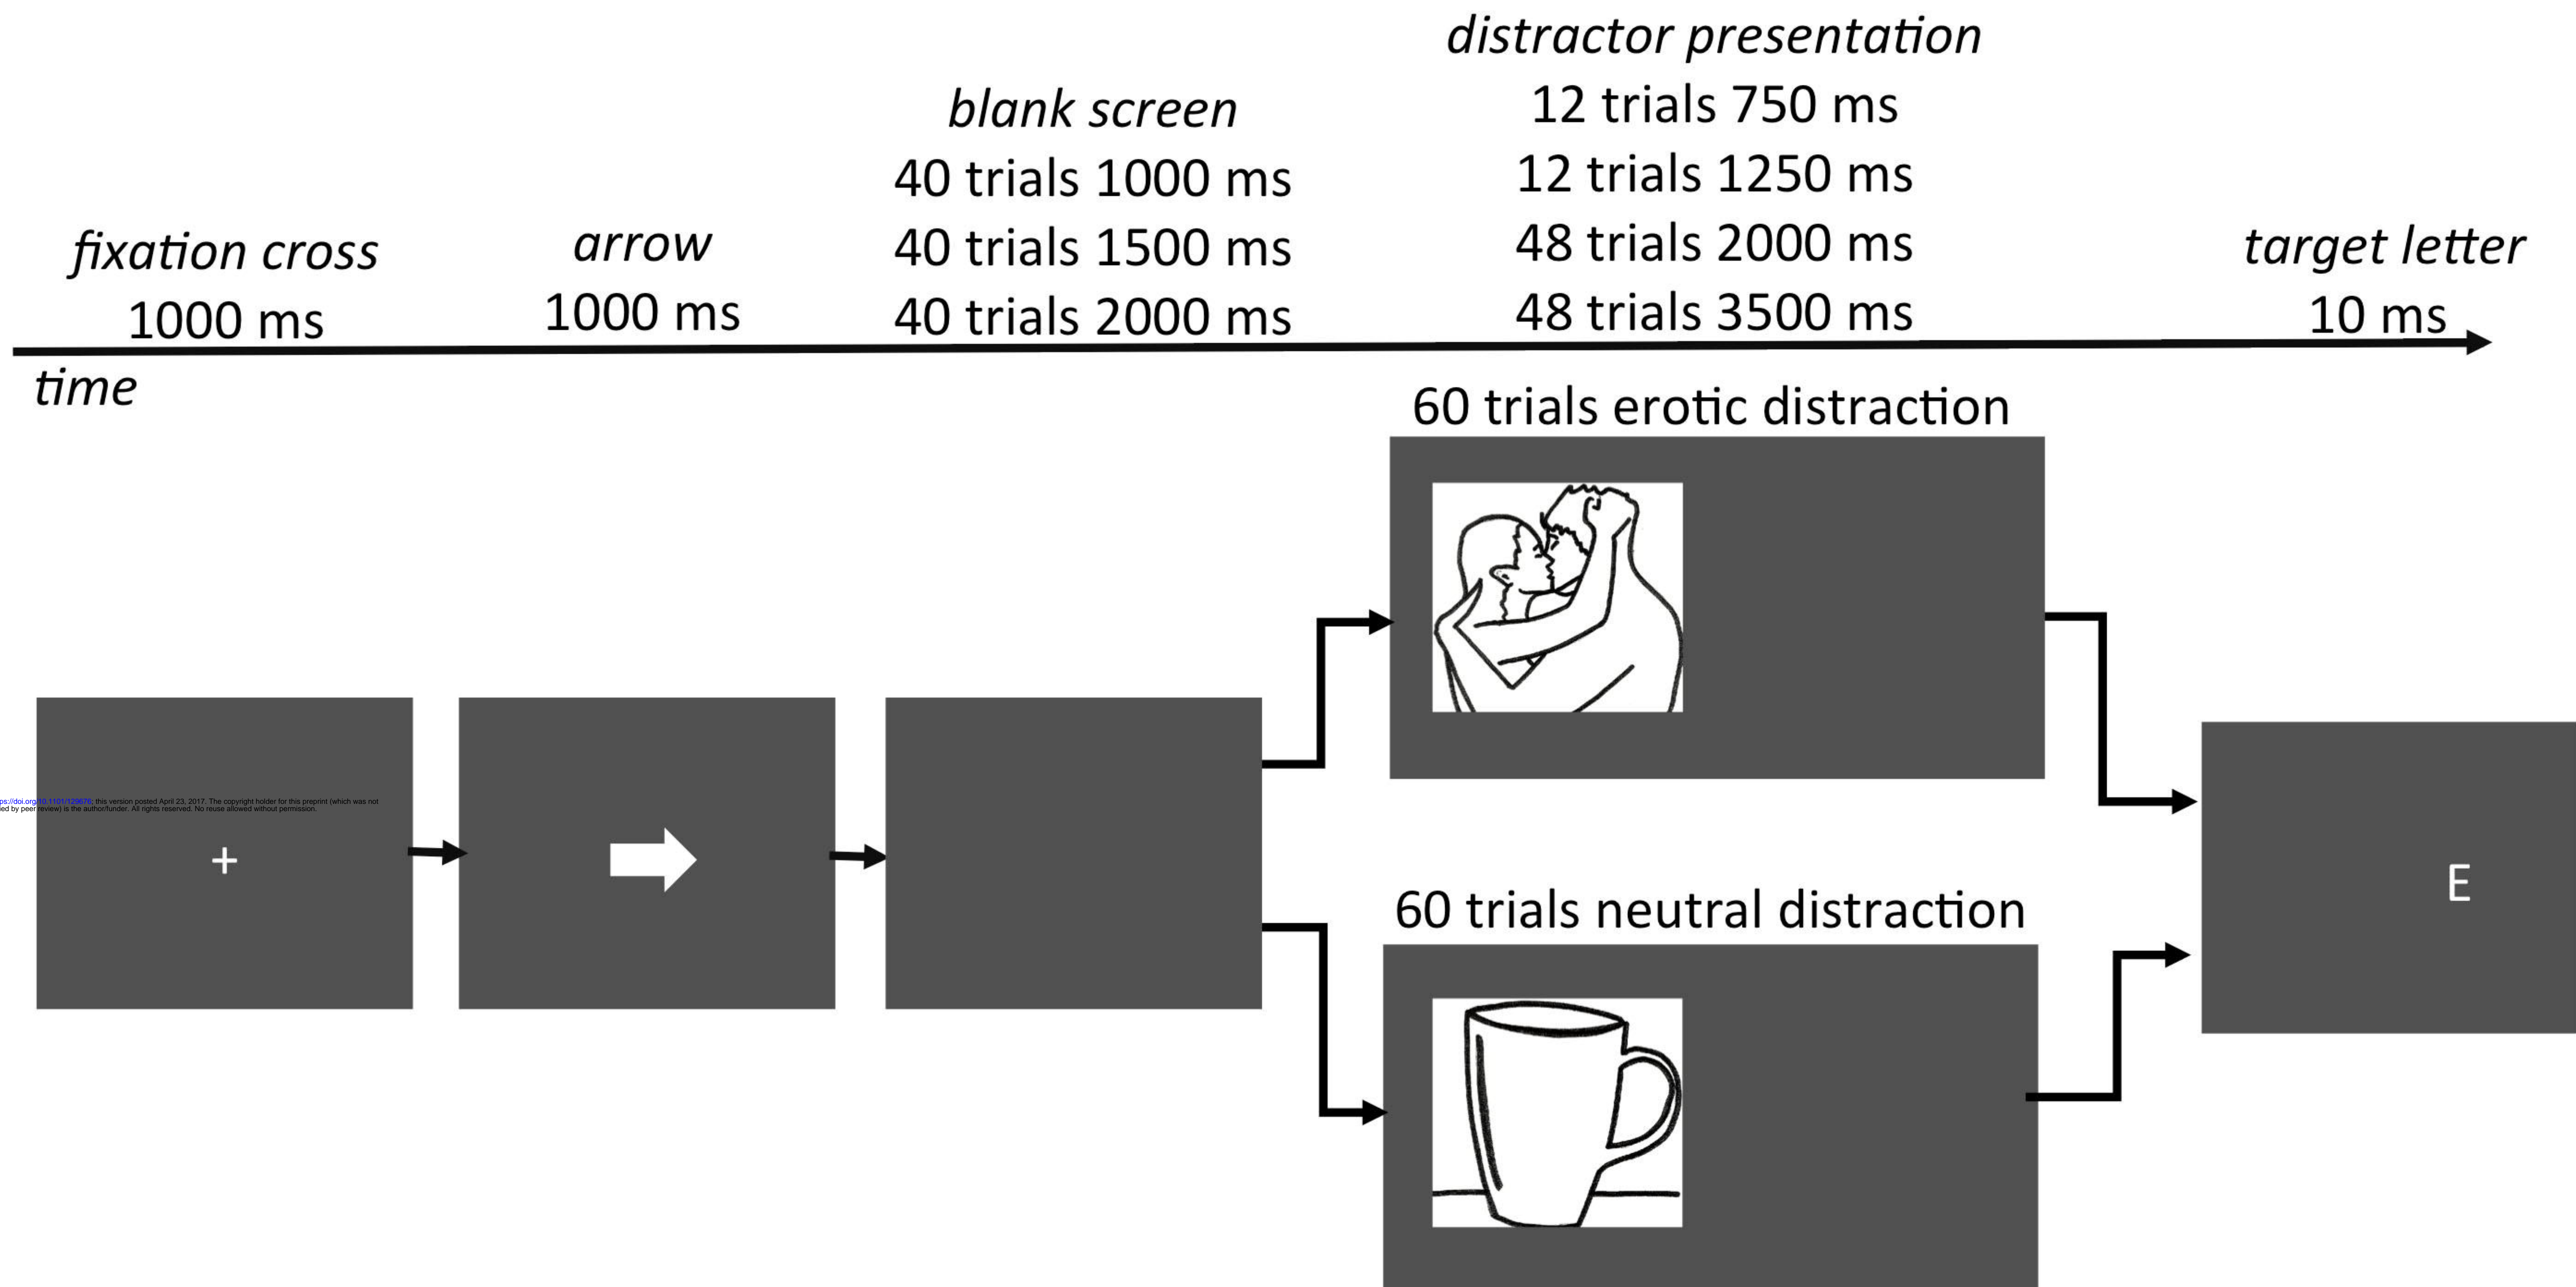



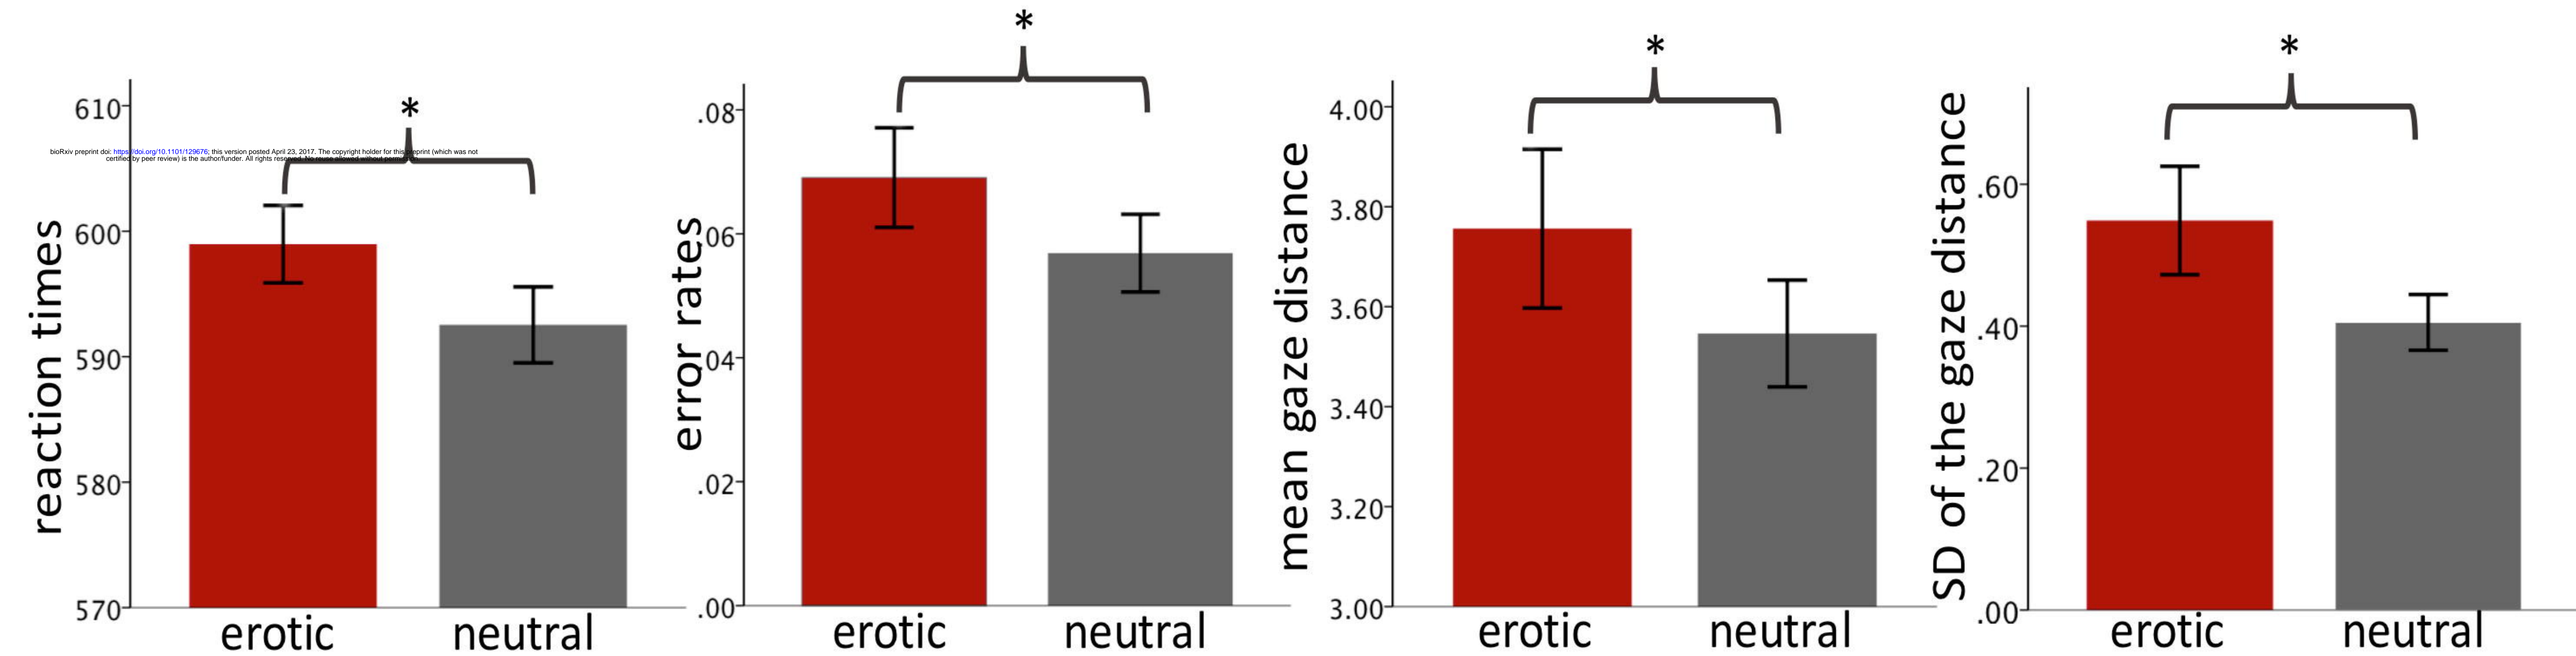







a)

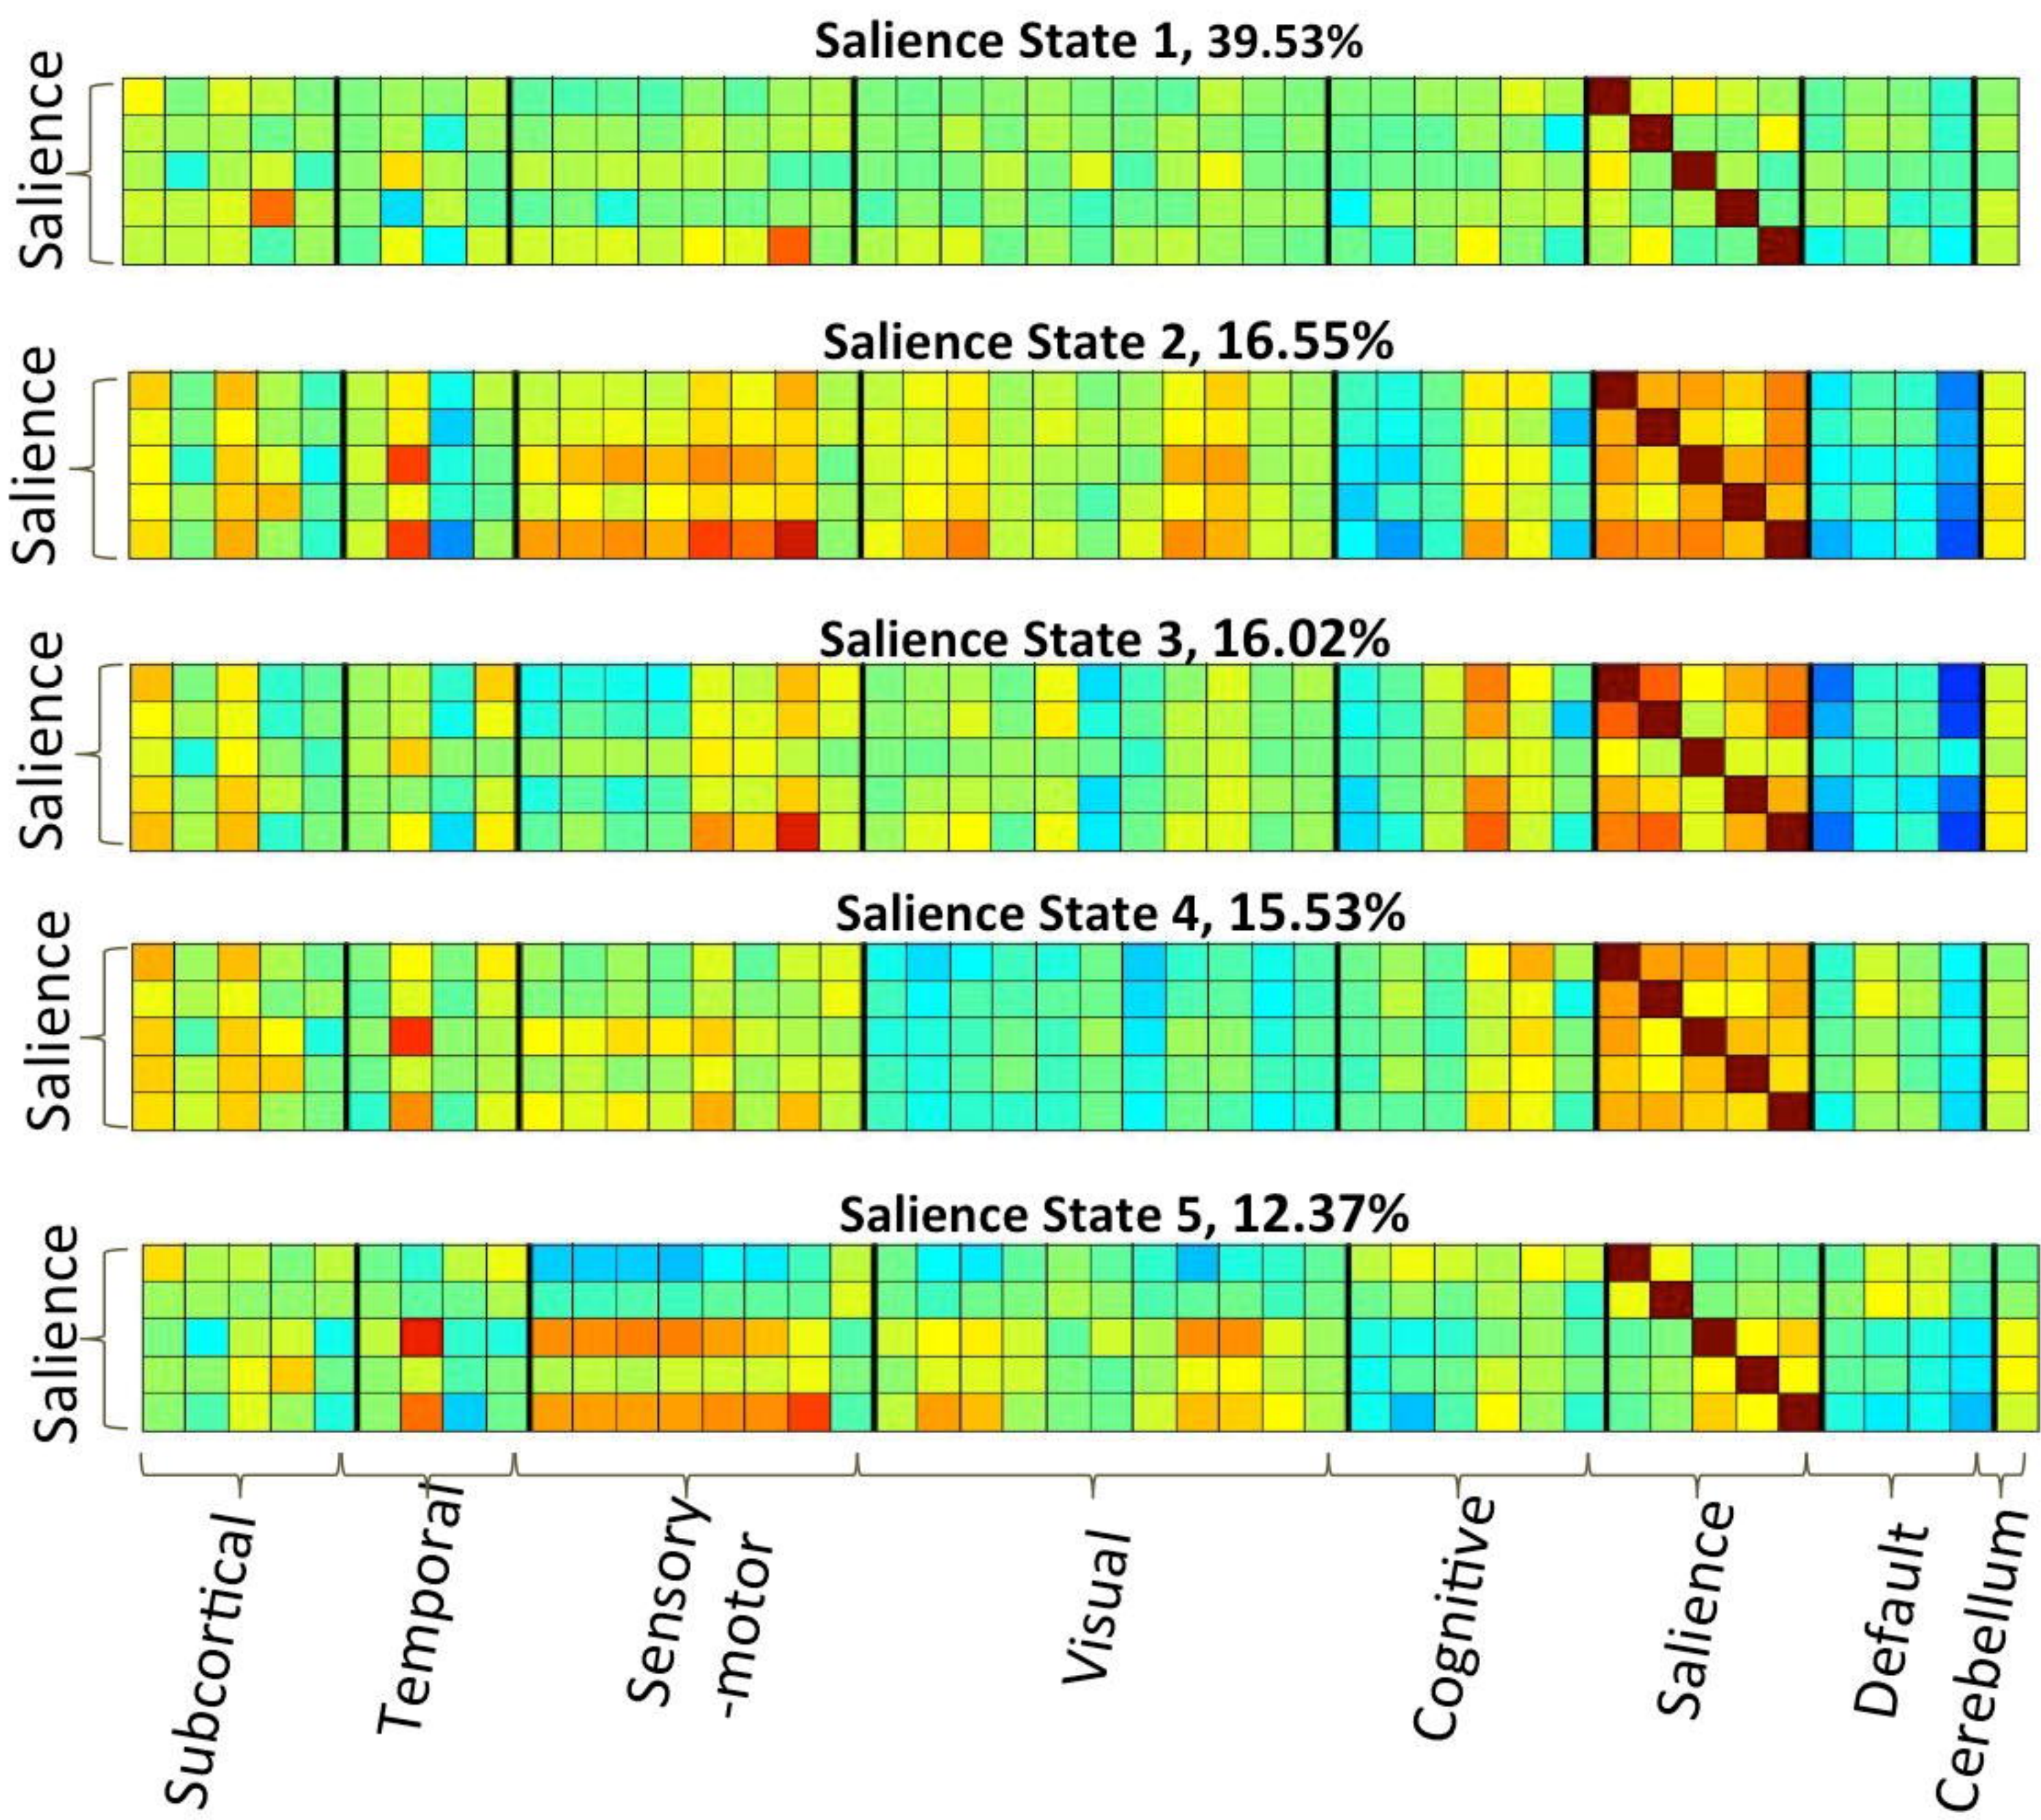

b)

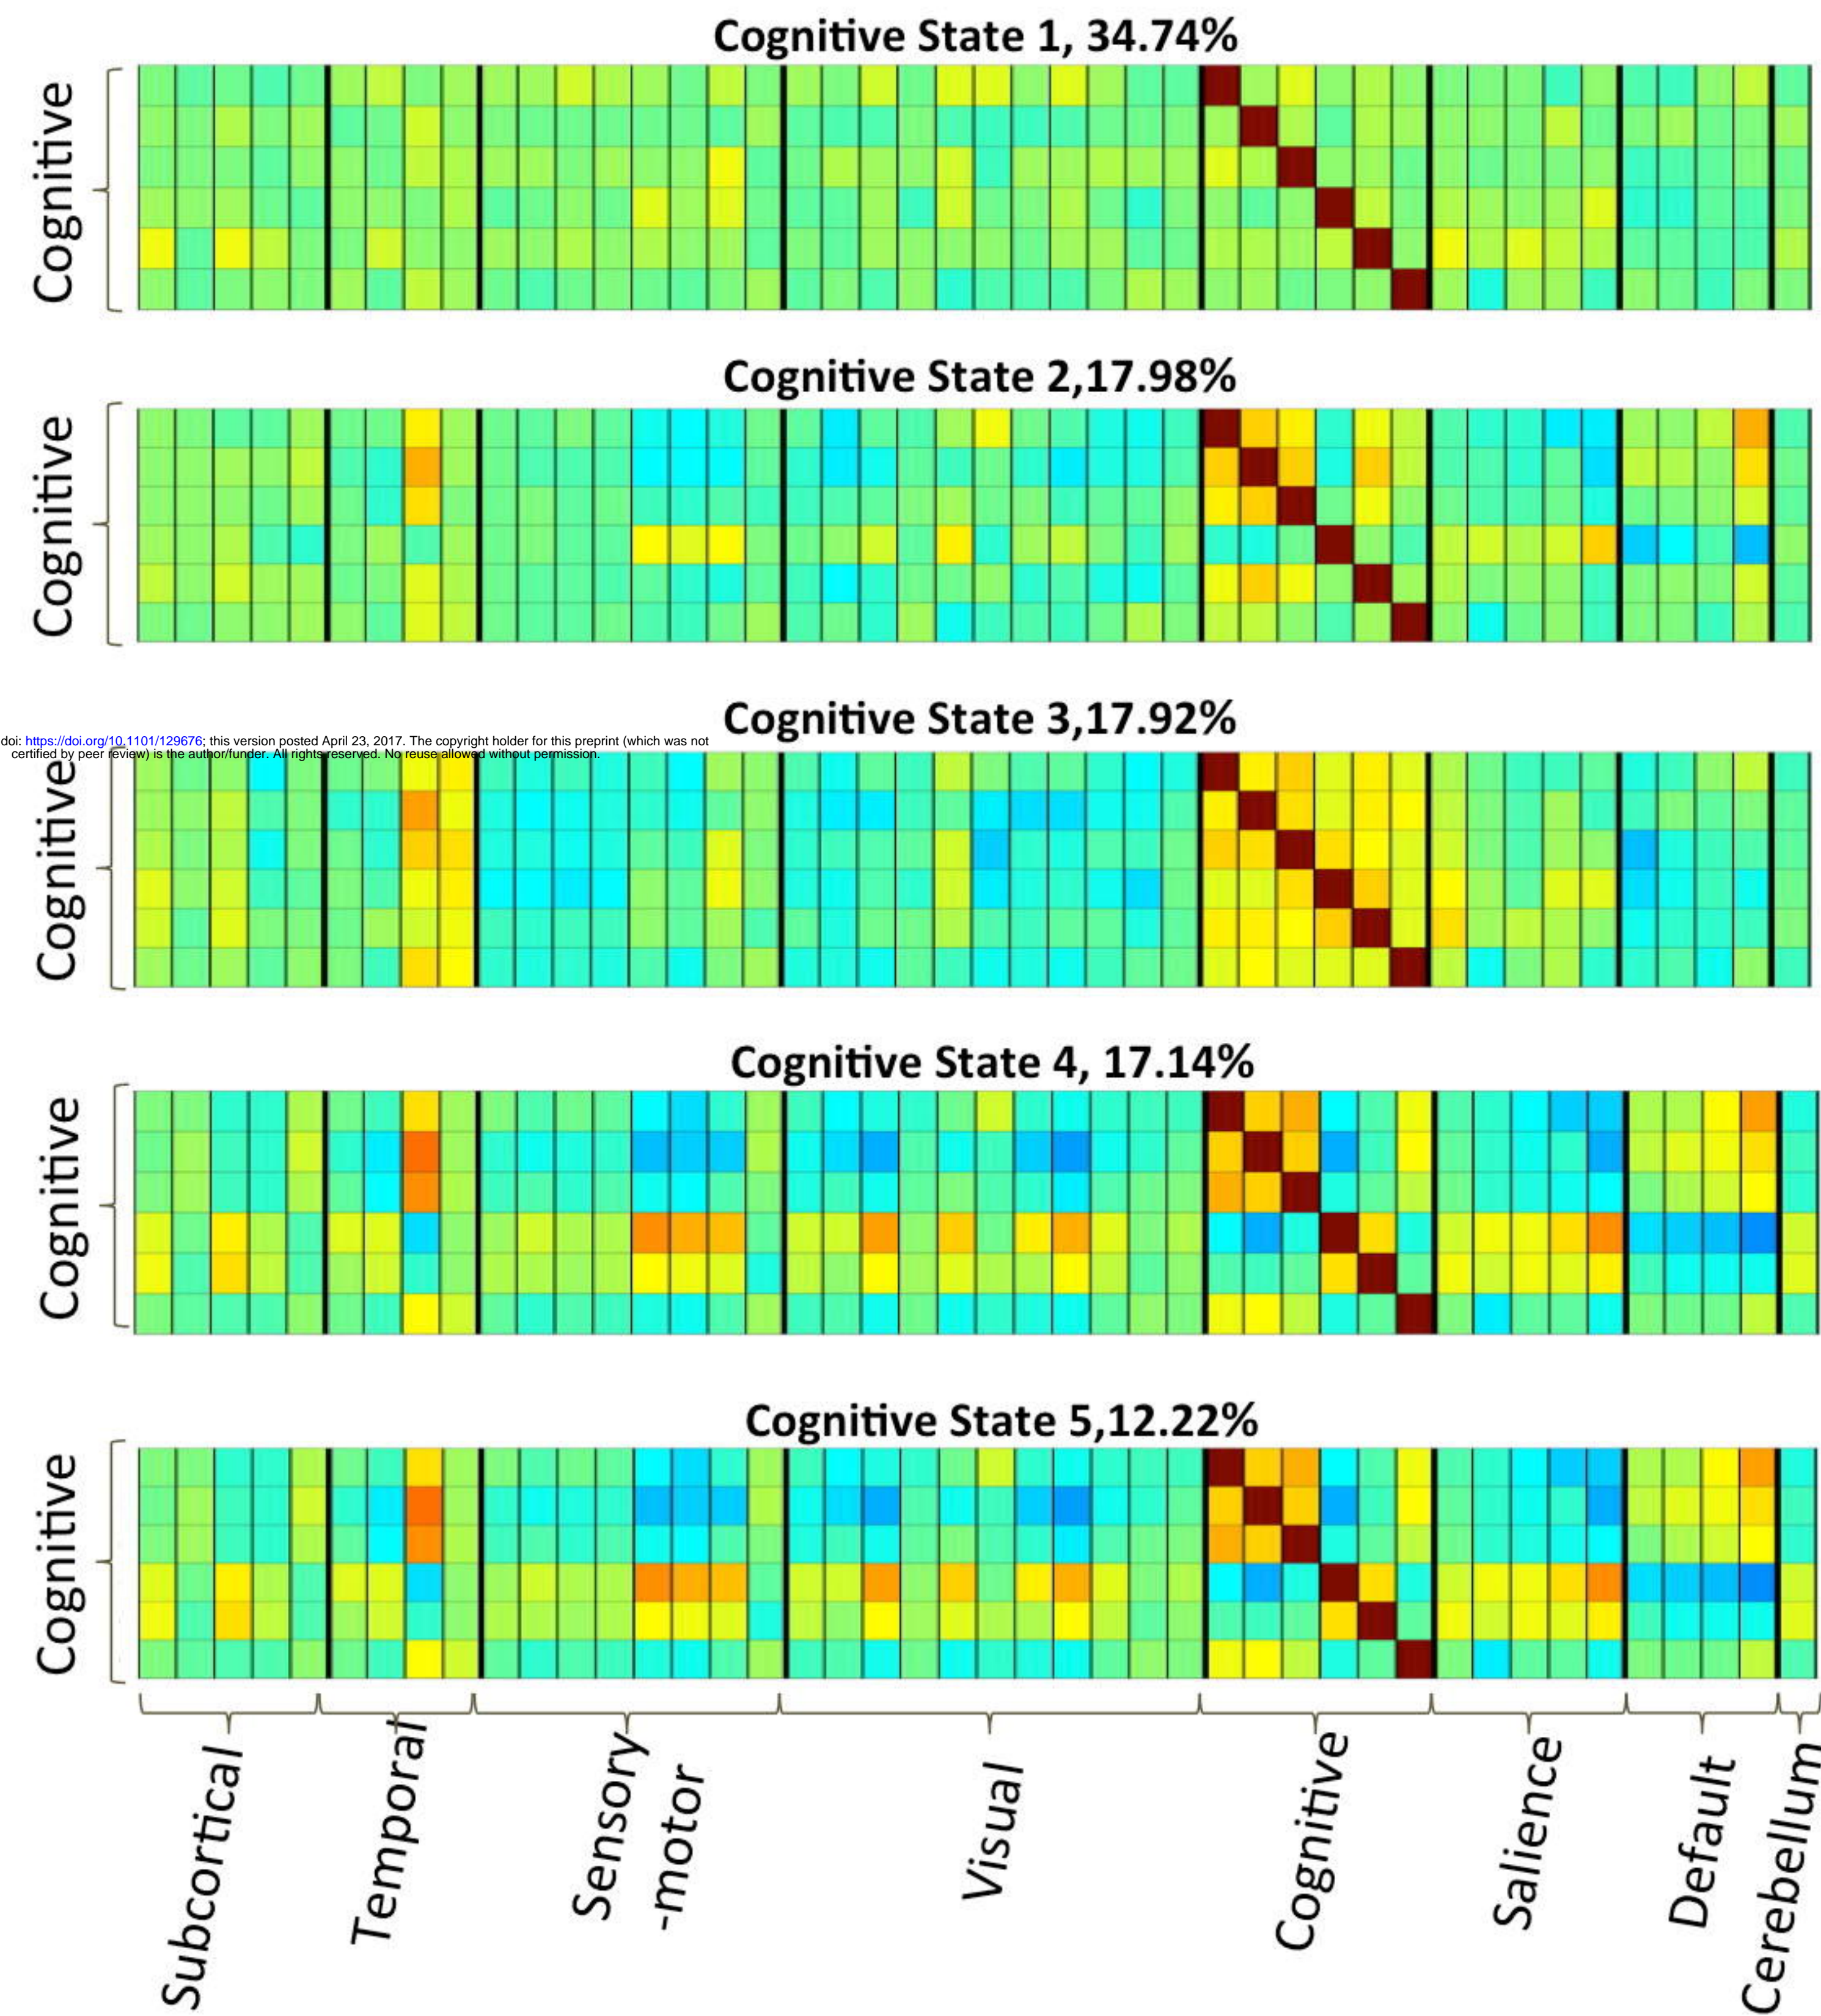



a) Frequency of Saliense States

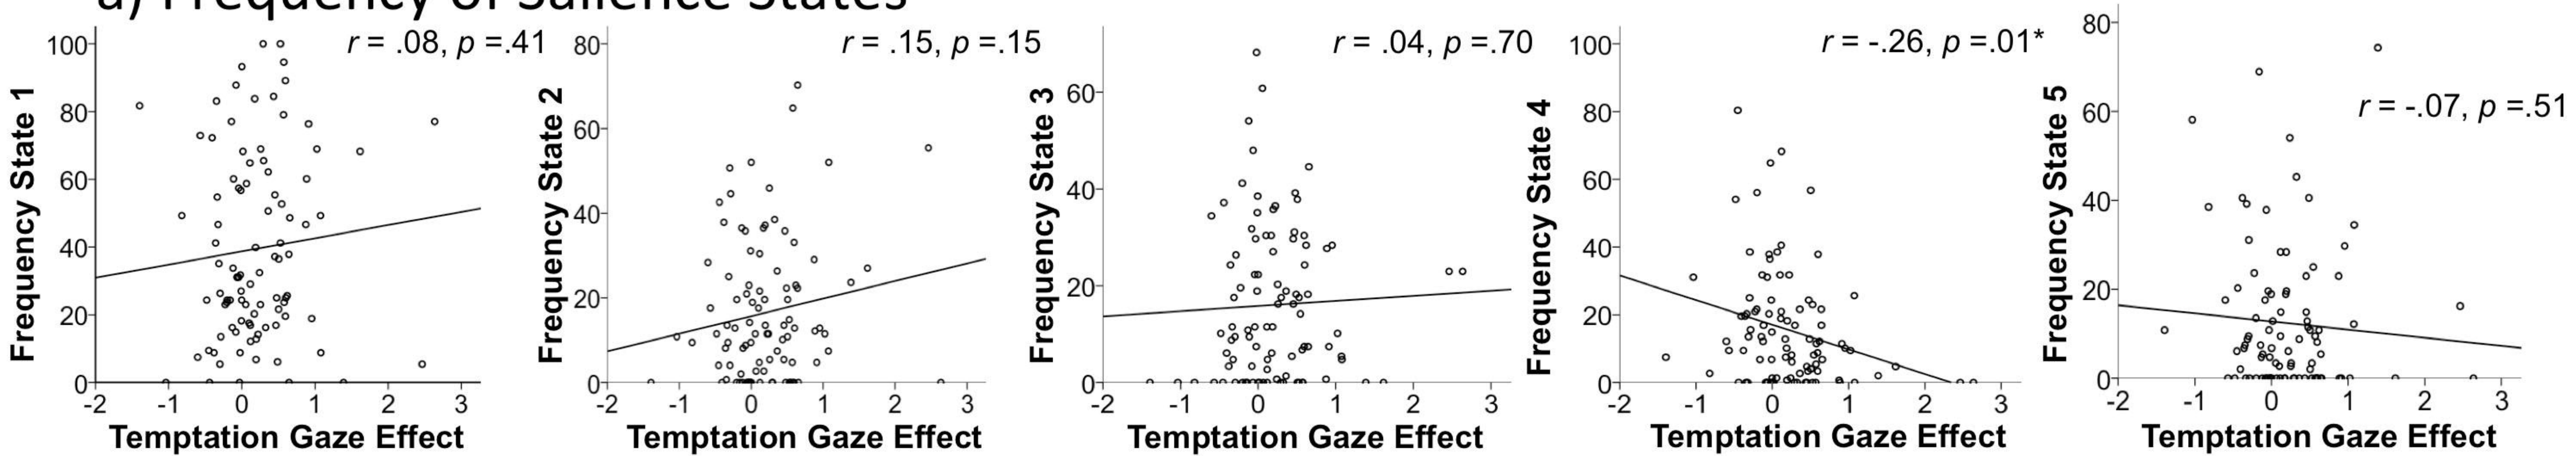

bioRxiv preprint doi: <https://doi.org/10.1101/129676>; this version posted April 23, 2017. The copyright holder for this preprint (which was not certified by peer review) is the author/funder. All rights reserved. No reuse allowed without permission.

b) Dwell Time of Saliense States

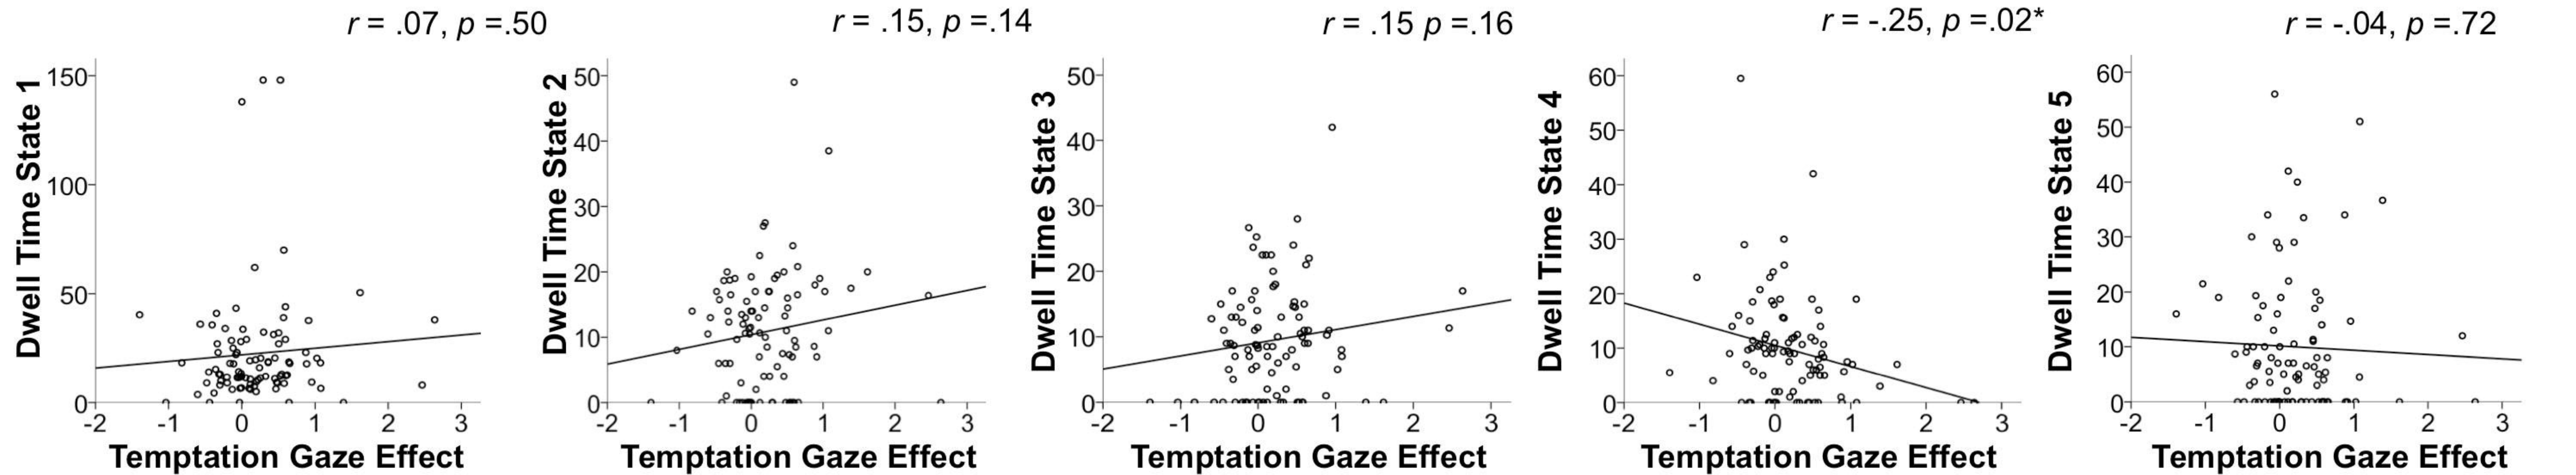



# a) Frequency of Cognitive States

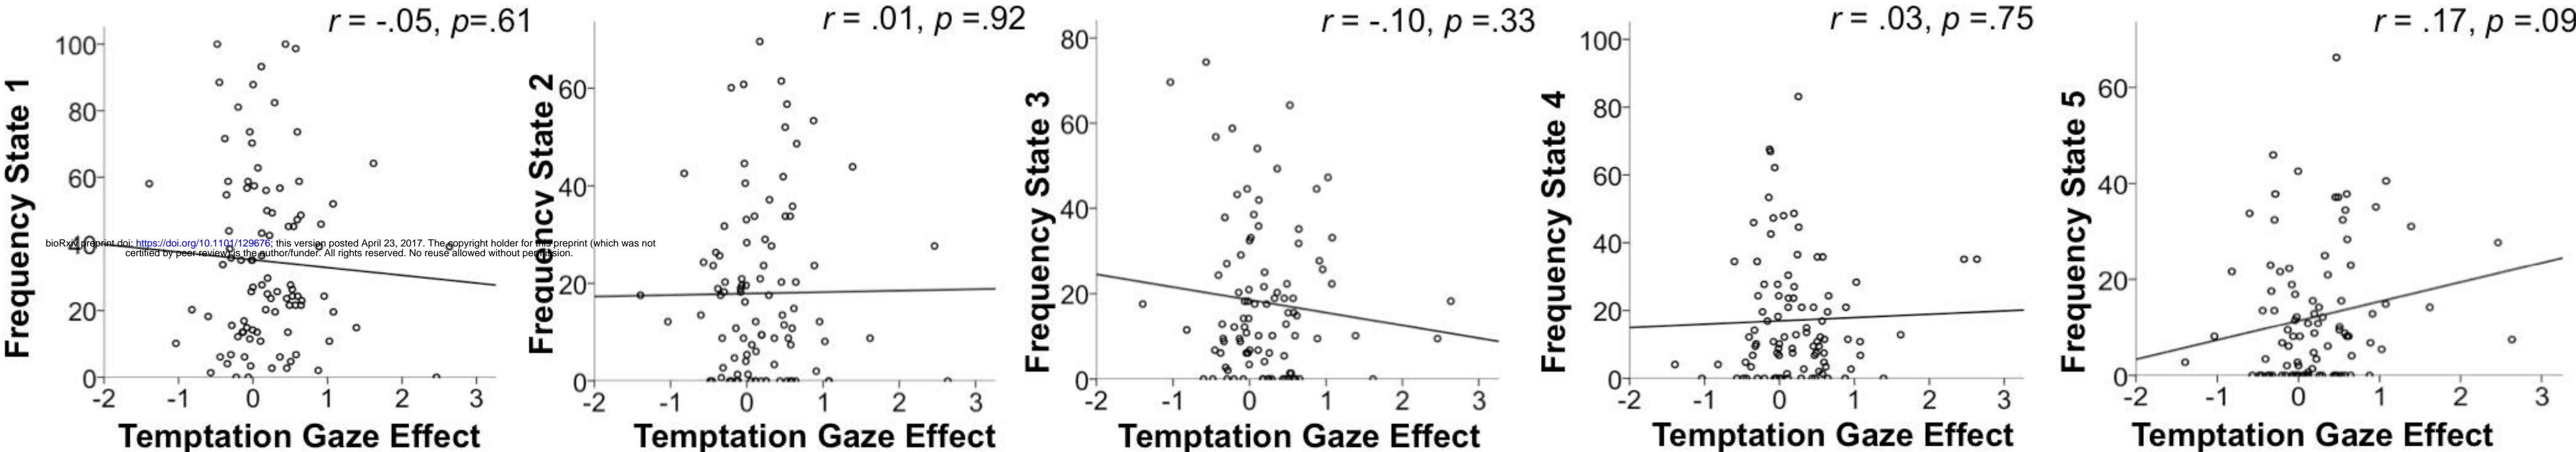

# b) Dwell Time of Cognitive States

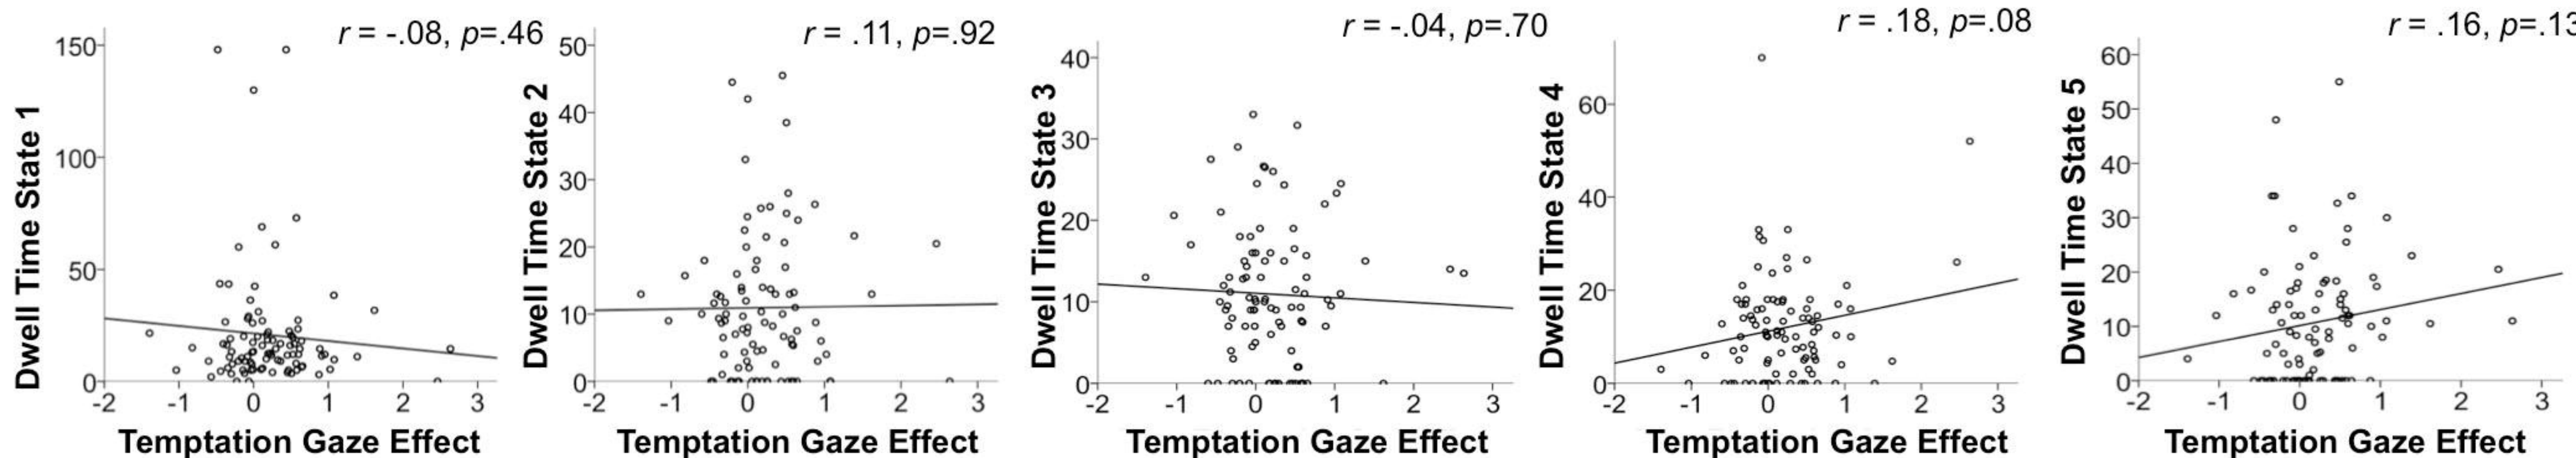

Source: http://biorxiv.org/content/10.1101/129676v1.full.pdf
